# Supplementary material
Source: PubMed Central journal article supplement (PMC11028600)
Supplement: 262_2017_1999_MOESM1_ESM.pdf [file 262_2017_1999_MOESM1_ESM.pdf]

# Supplementary Materials

Supplementary Table 1. Intratumoral heterogeneity of CD274 expression in CRC

|                     |          | CD274 <sup>TC</sup> |                   |
|---------------------|----------|---------------------|-------------------|
|                     |          | Negative            | Positive          |
| <b>MSI-H, n=186</b> |          |                     |                   |
| CD274 <sup>TP</sup> | Negative | 129 (69.4%)         | <b>10 (5.4%)</b>  |
|                     | Positive | <b>14 (7.5%)</b>    | 33 (17.7%)        |
|                     |          | CD274 <sup>IC</sup> |                   |
|                     |          | Negative            | Positive          |
| <b>MSI-H, n=186</b> |          |                     |                   |
| CD274 <sup>IP</sup> | Negative | 58 (31.2%)          | <b>26 (14.0%)</b> |
|                     | Positive | <b>21 (11.3%)</b>   | 81 (43.5%)        |
|                     |          | CD274 <sup>IC</sup> |                   |
|                     |          | Negative            | Positive          |
| <b>MSS, n=153</b>   |          |                     |                   |
| CD274 <sup>IP</sup> | Negative | 83 (54.2%)          | <b>14 (9.1%)</b>  |
|                     | Positive | <b>23 (15.0%)</b>   | 33 (21.6%)        |

Abbreviations: CRC, colorectal cancer; IC, immune cells at the center; IP, immune cells at the periphery; MSS, microsatellite stable; MSI-H, microsatellite instability-high; TC, tumor cells at the center; TP, tumor cells at the periphery

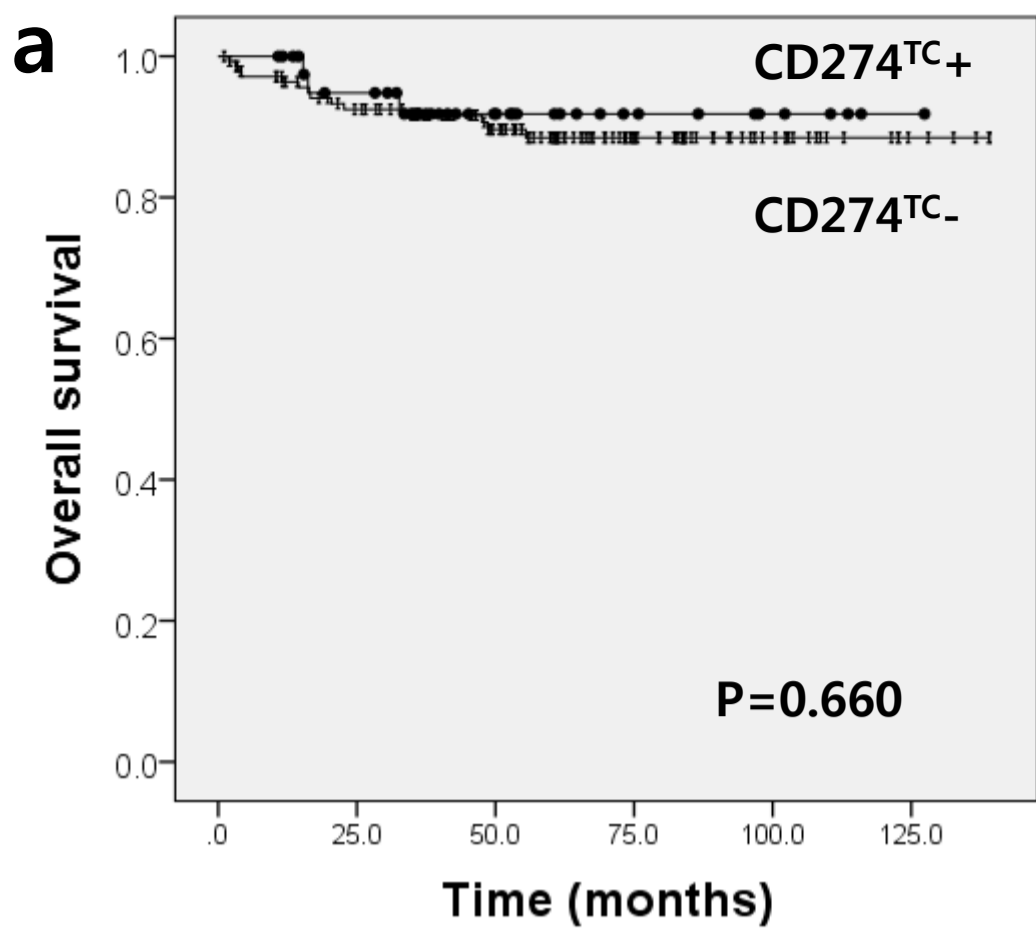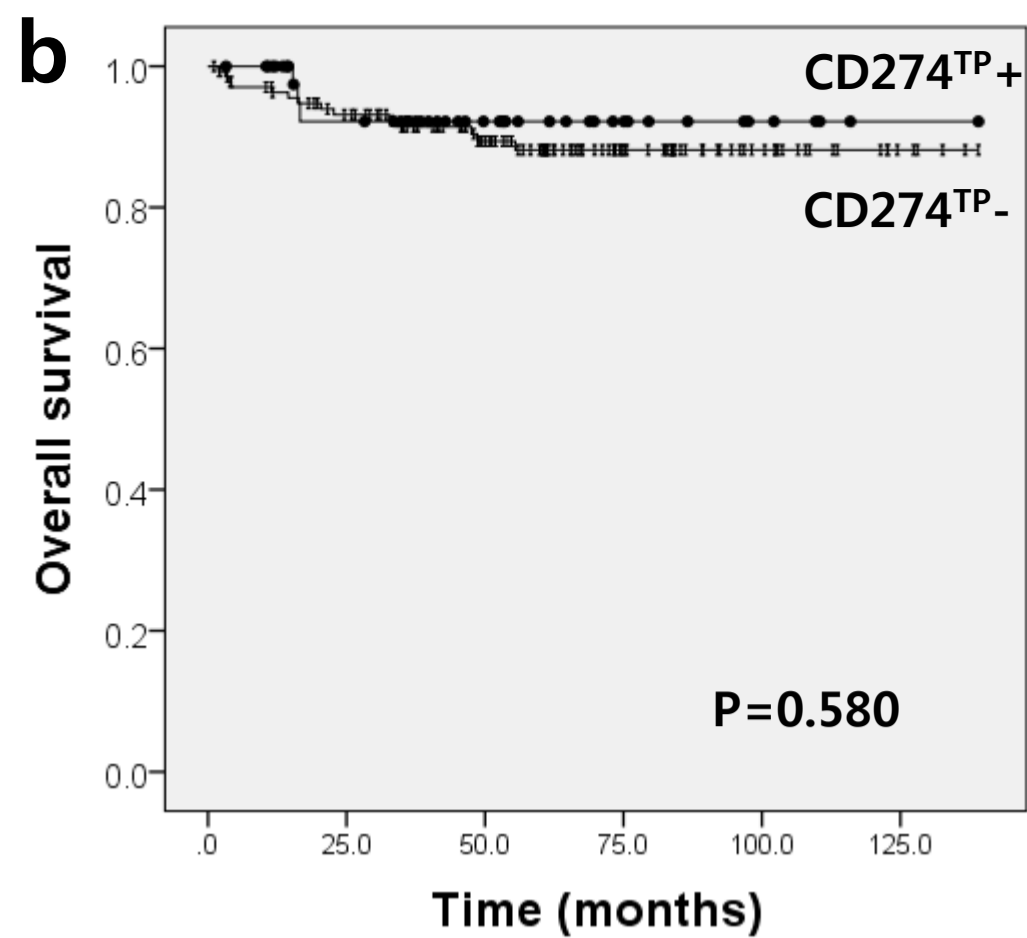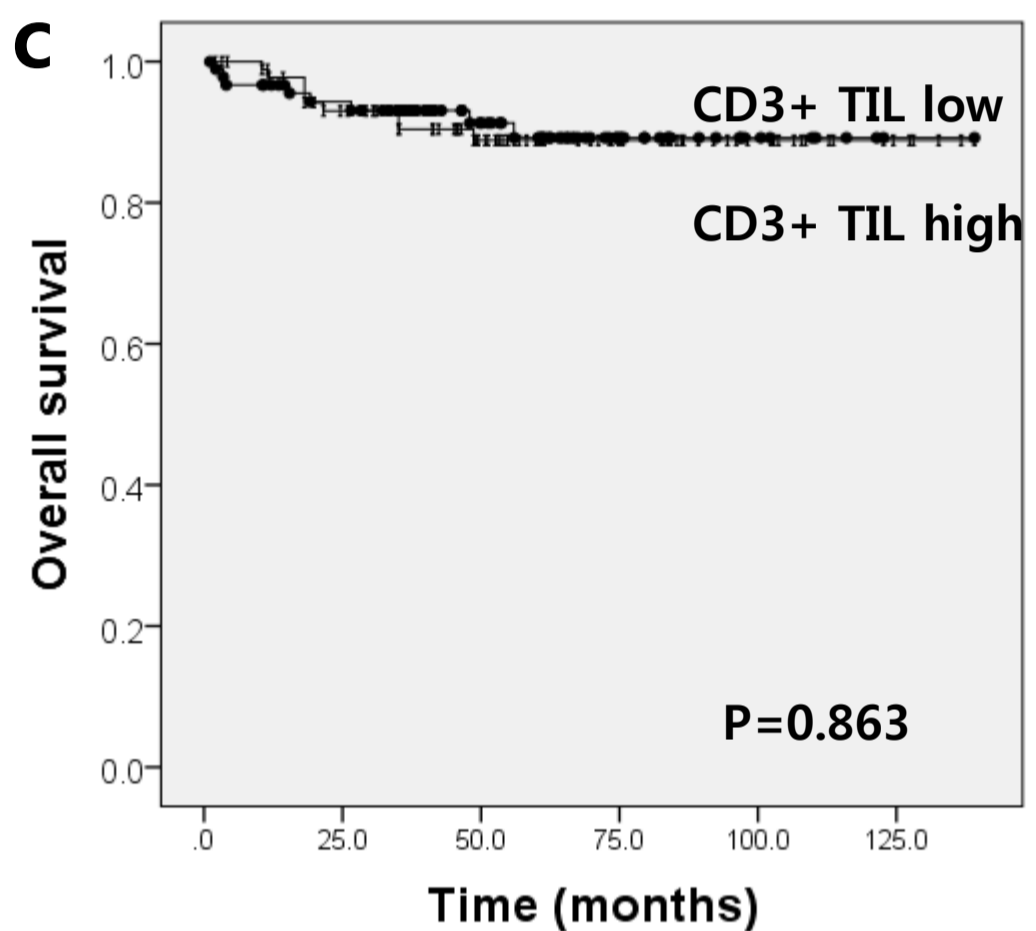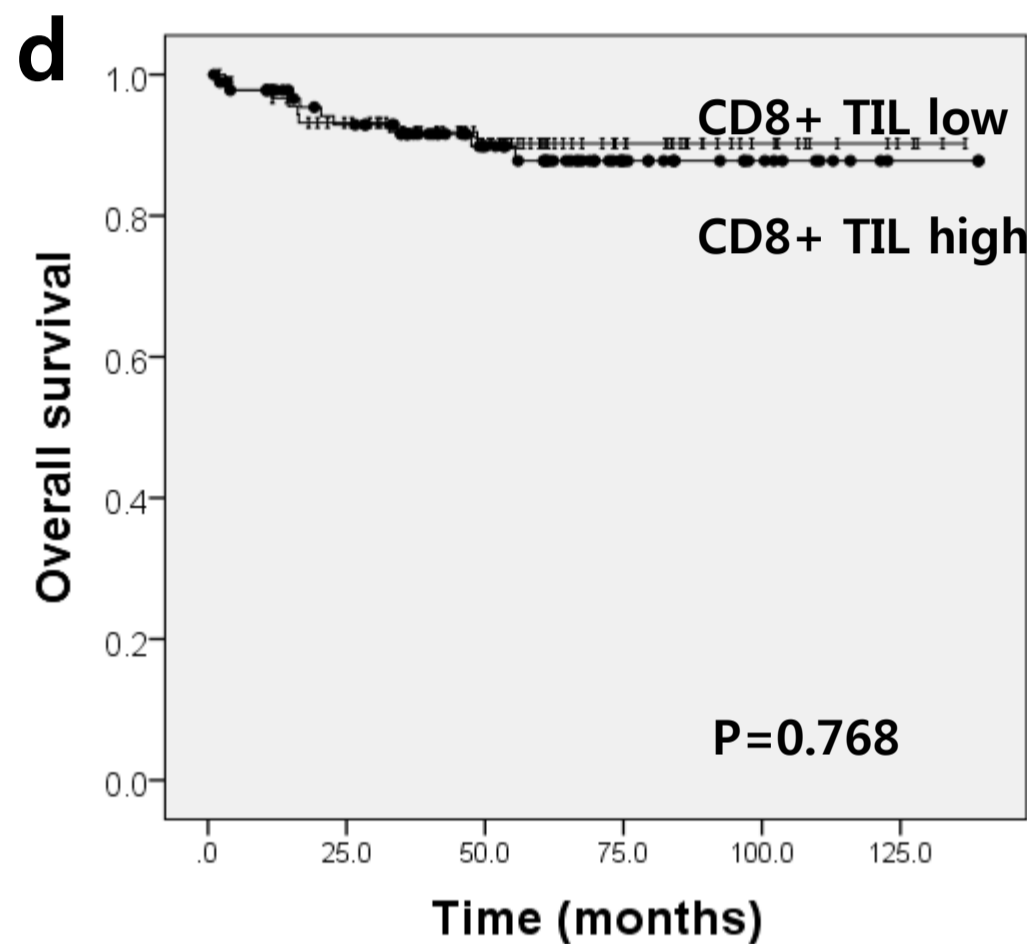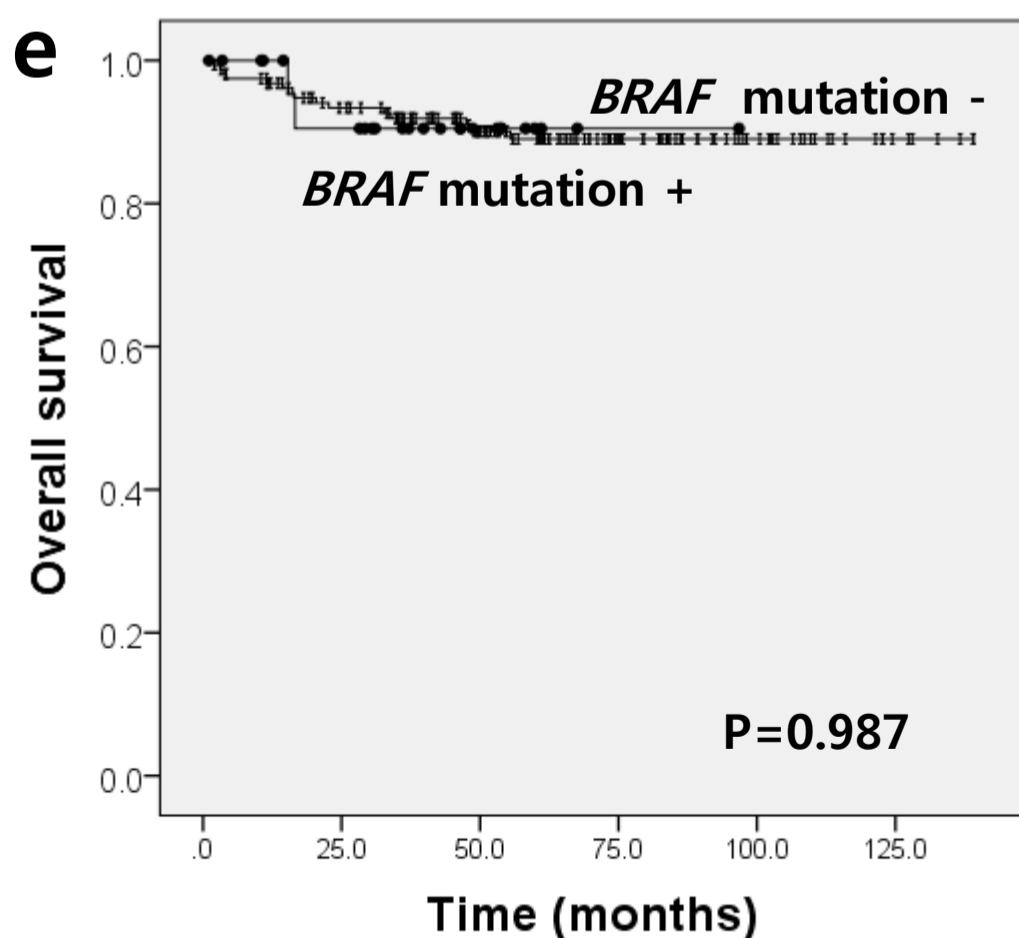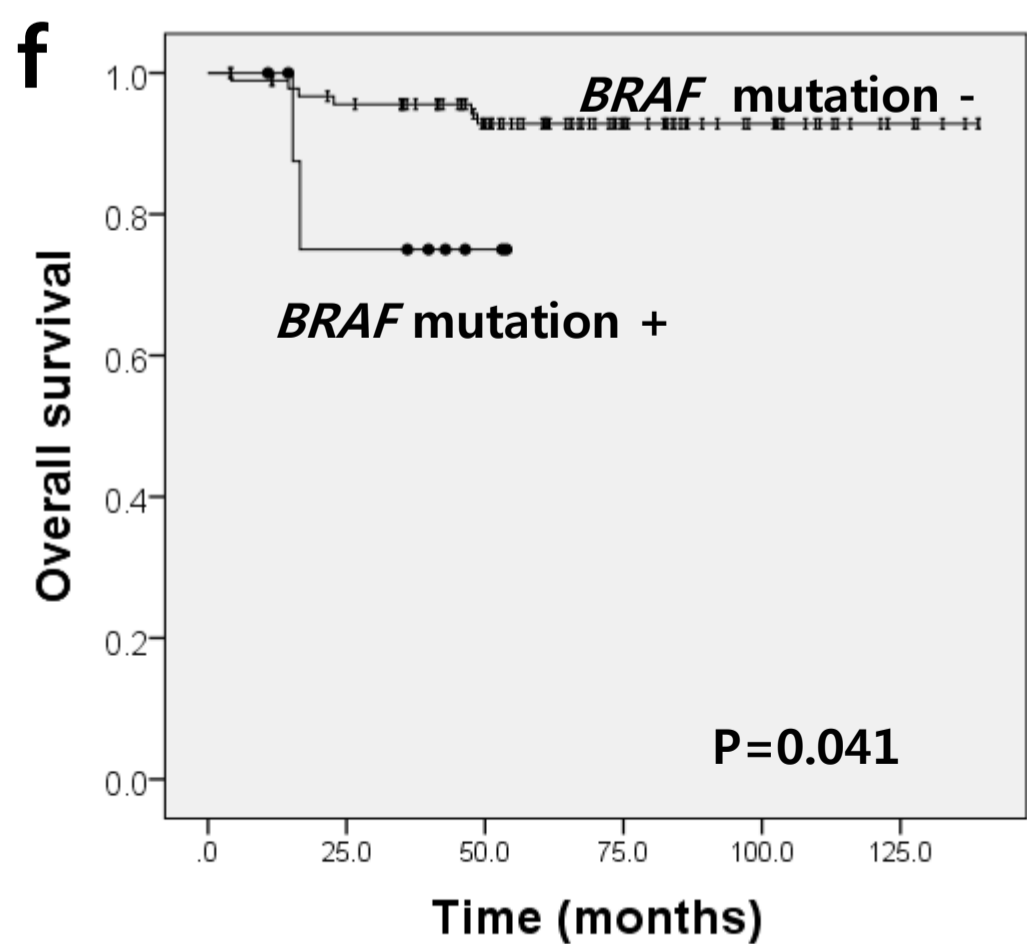

**Supplementary Figure 1.** Kaplan–Meier survival curves illustrating the prognostic effect of CD274 expression on tumor cells, TIL density and *BRAF* status in MSI-H colorectal cancer. (a and b) CD274 expression on tumor cells at (a) the tumor center and (b) tumor periphery. (c) CD3 expression on tumor-infiltrating lymphocytes; (d) CD8 expression on tumor-infiltrating lymphocytes. (e and f) *BRAF* mutation in (e) all of MSI-H CRC patients and in (f) subgroup of patients who received post-operative chemotherapy in MSI-H CRC.
